# Supplementary material for: Effects of Resistance Training Movement Pattern and Velocity on Isometric Muscular Rate of Force Development: A Systematic Review with Meta-analysis and Meta-regression
Source: Springer Nature journal article supplement (doi:10.1007/s40279-019-01239-x), 2020-02-08
Supplement: MOESM5 [file 17662668]

## Sheet: Table 2 
	Table 2. Pre- to post-intervention analyses
	Group	Model	n groups	Coeff. (95% CI)	p	Moderator Coeff. (95% CI)	p		τ2	Adj. R2	I2	p
	RFDmax	week	59	0.56 [0.23, 0.88]	<0.001	-0.03 [-0.06, 0.00]	0.1		0.13	0.0475	0.4672	<0.001
		week (without women)	51	0.59 [0.24, 0.95]	0.001	-0.03 [-0.07, 0.00]	0.09		0.15	0.0561	0.5077	<0.001
		week (without women/both)	36	0.58 [0.18, 0.98]	0.005	-0.03 [-0.07, 0.01]	0.15		0.15	0.0328	0.4848	<0.001
	Fast movement	week	15	0.80 [-0.01, 1.60]	0.052	-0.01 [-0.10, 0.08]	0.76		0.2	0	0.5179	0.013
		week (without Women)	12	1.32 [0.43, 2.21]	0.004	-0.06 [-0.15, 0.03]	0.21		0.12	0.1131	0.3982	0.085
		week (without Women/both)	7	1.96 [0.78, 3.14]	0.001	-0.11 [-0.22, -0.01]	0.031		0.047	0.7417	0.2042	0.29
	Slow movement	week	24	0.25 [-0.19, 0.69]	0.259	0.00 [-0.04, 0.05]	0.873		0.11	0	0.3974	0.034
	(with intent)	week (without Women)	21	0.28 [-0.17, 0.74]	0.221	0.00 [-0.05, 0.05]	0.904		0.13	0	0.4389	0.022
		week (without Women/both)	15	0.33 [-0.05, 0.71]	0.09	0.02 [-0.02, 0.06]	0.26		0	0	0	0.71
	Slow movement	week	17	0.41 [-0.14,0.95]	0.142	-0.28 [-0.09, 0.03]	0.355		0.05	0	0.3172	0.185
	(without intent)	week (without Women)	14	0.27 [-0.35, 0.90]	0.392	-0.02 [-0.08, 0.05]	0.592		0.06	0	0.369	0.126
		week (without Women/both)	12	0.20 [-0.33,0.74]	0.458	-0.03 [-0.09, 0.03]	0.347		0.01	0	0.0584	0.536
	Training	week	41	0.59 [0.26, 0.91]	<0.001	-0.03 [-0.06, 0.01]	0.117		0.11	0.0735	0.3902	0.007
	Specific	week (without Women)	33	0.65 [0.28, 1.01]	<0.001	-0.03 [-0.07, 0.01]	0.108		0.14	0.0926	0.445	0.004
		week (without Women/both)	26	0.66 [0.21, 1.11]	0.004	-0.03 [-0.08, 0.01]	0.156		0.18	0.0636	0.5141	0.002
	Training	week	17	0.37 [-0.95, 1.68]	0.58	0.02 [-0.15, 0.116]	0.802		0.2	0	0.6334	<0.001
	Non-specific	week (without Women)
		week (without Women)	10	0.08 [-1.01, 1.16]	0.89	0.00 [-1.10, 0.12]	0.88		0.09	0	0.3898	0.097
	Early phase	week	42	0.62 [0.25, 0.99]	<0.001	-0.01 [-0.05, 0.04]	0.798		0.17	0	0.5176	<0.001
		week (without Women)	36	0.62 [0.17, 1.11]	0.006	-0.01 [-0.06, 0.05]	0.828		0.23	0	0.5821	<0.001
		week (without Women/both)	25	0.41 [-0.15, 0.83]	0.059	-0.00 [-0.05, 0.05]	0.987		0.088	0	0.3391	0.052
	Later phase	week	61	0.07 [-0.27, 0.40]	0.699	0.05 [0.001, 0.09]	0.047		0.084	0.0945	0.3081	0.019
		week (without Women)	54	0.08 [-0.28, 0.43]	0.66	0.04 [-0.00, 0.09]	0.066		0.08	0.0668	0.2915	0.054
		week (without Women/both)	41	-0.05 [-0.49, 0.38]	0.27	0.06 [-0.00, 0.11]	0.055		0.061	0.1929	0.2093	0.19
