# Supplementary material for: Effects of Resistance Training Movement Pattern and Velocity on Isometric Muscular Rate of Force Development: A Systematic Review with Meta-analysis and Meta-regression
Source: Springer Nature journal article supplement (doi:10.1007/s40279-019-01239-x), 2020-02-08
Supplement: MOESM6 [file 17662668]

## Sheet: Table 3
	Table 3. Intervention vs. control group analyses
	Group	Model	n studies	Coeff. (95% CI)	p	Moderator Coeff. (95% CI)	p		τ2	Adj. R2	I2	p
	RFDmax	week	34	0.68 [0.12, 1.23]	0.017	-0.04 [-0.11, 0.02]	0.17		0.16	0.0354	0.5183	<0.001
		week (without women)	26	0.83 [0.29, 1.37]	0.003	-0.06 [-0.12, 0.00]	0.067		0.11	0.1295	0.4304	0.008
		week (without women/both)	24	0.80 [0.23, 1.36]	0.006	-0.04 [-0.10, 0.02]	0.17		0.062	0.0136	0.2801	0.135
	Fast movement	week	10	0.66 [-0.65, 1.97]	0.326	-0.012 [-0.15, 0.12]	0.858		0.528	0	0.728	<0.001
		week (without women)	8	1.55 [0.69, 2.40]	<0.001	-0.073 [-0.15, 0.01]	0.067		0	0.9667	0.0115	0.438
		week (without women/both)	7	2.20 [1.08, 3.32]	<0.001	-0.12 [-0.22, -0.03]	0.01		0	1	0	0.72
	Slow movement	week	15	0.90 [0.23, 1.56]	0.008	-0.06 [-0.13, 0.02]	0.136		0	NA%	0	0.838
	(with intent)	week (without women)	15	0.90 [0.23, 1.56]	0.008	-0.06 [-0.13, 0.02]	0.136		0	NA%	0	0.838
		week (without women/both)	12	0.86 [0.19, 1.53]	0.012	-0.04 [-0.12, 0.04]	0.284		0	NA%	0	0.814
	Slow movement	week	8	0.31 [-0.81, 1.43]	0.59	-0.01 [-0.146, 0.122]	0.59		0	NA%	0	0.485
	(without intent)	week (without women)	8	0.31 [-0.81, 1.43]	0.59	-0.01 [-0.146, 0.122]	0.59		0	NA%	0	0.485
		week (without women/both)	5	1.61 [-0.22, 3.45]	0.085	-0.19 [-0.42, 0.04]	0.1		0	NA%	0.0007	0.89
	Training	week	21	0.59 [0.02, 1.61]	0.044	-0.03 [-0.10, 0.05]	0.456		0.0745	0	0.2995	0.1
	Specific	week (without women)	19	0.75 [0.24, 1.27]	0.004	-0.04 [-0.10, 0.02]	0.22		0	NA%	0	0.776
		week (without women/both)	17	0.79 [0.23, 1.36]	0.006	-0.04 [-0.11, 0.02]	0.21		0	NA%	0	0.687
	Training	week
	Non-specific	week (without women)
		week (without women/both)	7	0.67 [1.42, 12.0]	0.013	-0.68 [-1.23, -0.12]	0.016		0.3	0.52	0.734	0.002
	Early phase	week	12	0.58 [0.09, 1.08]	0.022	-0.01 [-0.08, 0.05]	0.669		0	NA%	0	0.798
		week (without women)	12	0.54 [-0.07, 1.16]	0.084	-0.01 [-0.08, 0.07]	0.869		0	NA%	0	0.723
		week (without women/both)	9	0.61 [-0.06, 1.13]	0.074	-0.03 [-0.11, 0.06]	0.567		0.02	0	0.1126	0.564
	Later phase	week	13	0.13 [-0.34, 0.61]	0.589	0.03 [-0.03, 0.09]	0.27		0	NA%	0	0.97
		week (without women)	8	0.42 [-0.68, 1.52]	0.453	0.01 [-0.10, 0.12]	0.861		0	NA%	0	0.92
		week (without women/both)	5	0.60 [-0.54, 1.75]	0.302	0.00 [-0.12, 0.12]	0.994		0	NA%	0	0.87
